# Supplementary material for: Gene expression profiles underlying aggressive behavior in the prefrontal cortex of cattle
Source: PubMed Central journal article supplement (PMC8028707; doi:10.1186/s12864-021-07505-5), 2021-04-07
Supplement: 12864_2021_7505_MOESM2_ESM.pdf [file 12864_2021_7505_MOESM2_ESM.pdf]

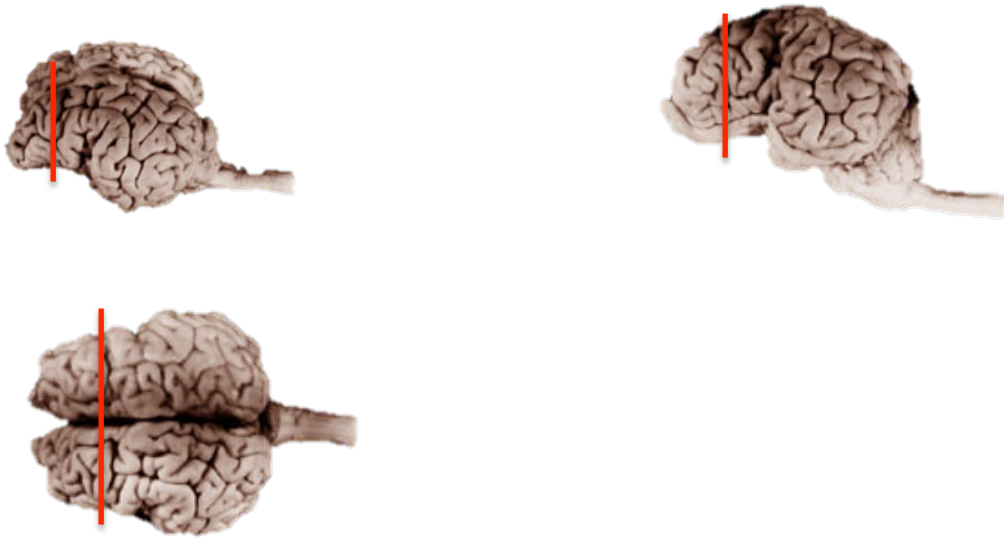

**Figure S1** Anatomical location of the medial prefrontal cortex (PFC) dissection samples.

Copyright images from <http://neuroscielibrary.org/>
